# Supplementary material for: STT3-dependent PD-L1 accumulation on cancer stem cells promotes immune evasion
Source: PubMed Central journal article supplement (PMC5954021; doi:10.1038/s41467-018-04313-6), 2018-05-15
Supplement: 41467_2018_4313_MOESM1_ESM.pdf [file 41467_2018_4313_MOESM1_ESM.pdf]

Supplementary Information

**STT3-dependent PD-L1 accumulation on cancer stem cells promotes immune evasion**

Hsu et al.

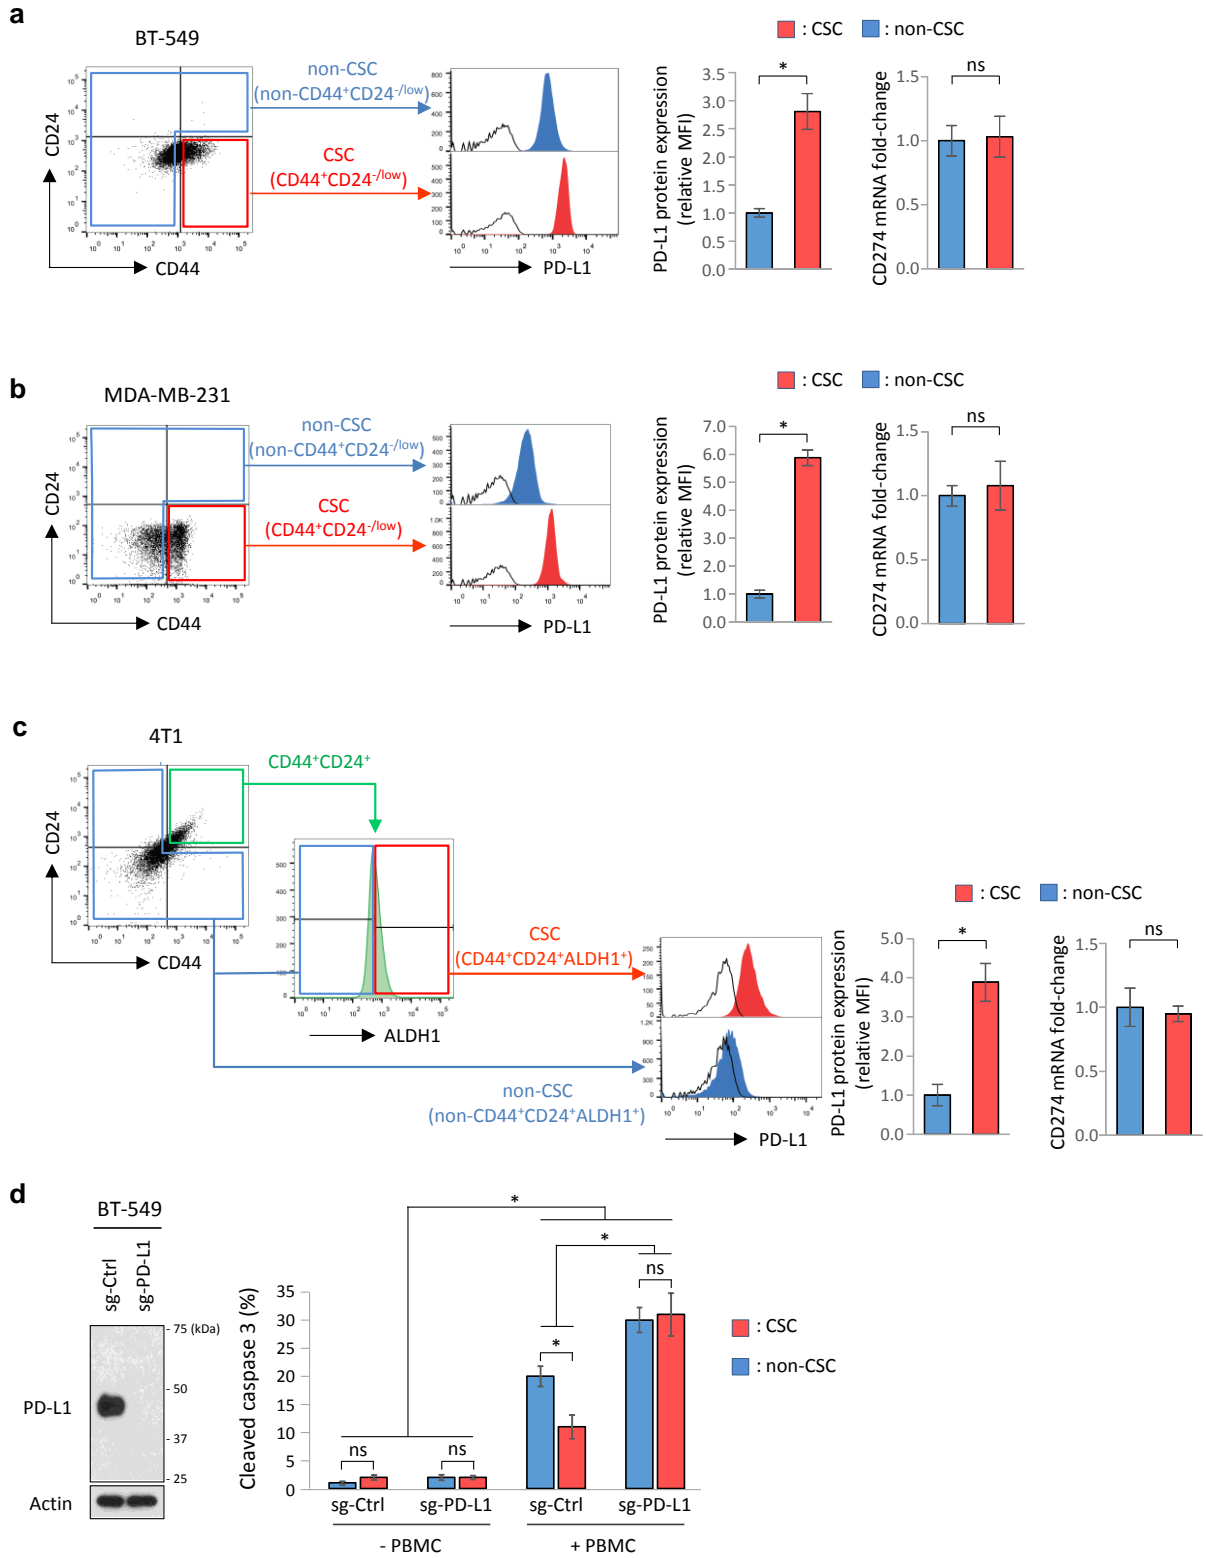

**Supplementary Figure 1. Compared with non-CSC populations, CSC populations have higher PD-L1 expression, which contributes to CSC immune evasion.**

**(a, b, c)** Flow cytometric analysis of PD-L1 protein expression and qRT-PCR analysis comparing PD-L1 (CD274) mRNA levels between the CSC (red gate) and non-CSC (blue gate) populations of TNBC cells, BT-549 **(a)**, MDA-MB-231 **(b)** and 4T1 **(c)**. The CSC populations of human TNBC cells (BT-549 and MDA-MB-231) were isolated by sorting for CD44<sup>+</sup>CD24<sup>-/low</sup> cells. The CSC populations of mouse TNBC cells (4T1) were isolated by sorting for CD44<sup>+</sup>CD24<sup>+</sup>ALDH1<sup>+</sup> cells.

**(d)** Bar graph showing the differential sensitivity to PBMC-mediated cancer cell killing between CSC and non-CSC populations of BT-549 cells in the presence or absence of PD-L1. BT-549 cells were incubated with activated PBMCs for 48 hours. After incubation, PBMC-mediated cancer cell killing on CSC and non-CSC populations was measured by flow cytometric analysis of cleaved caspase 3.

Error bars represent s.d. (n = 3). \*: P < 0.05; ns: non-significant, Student's t-test.

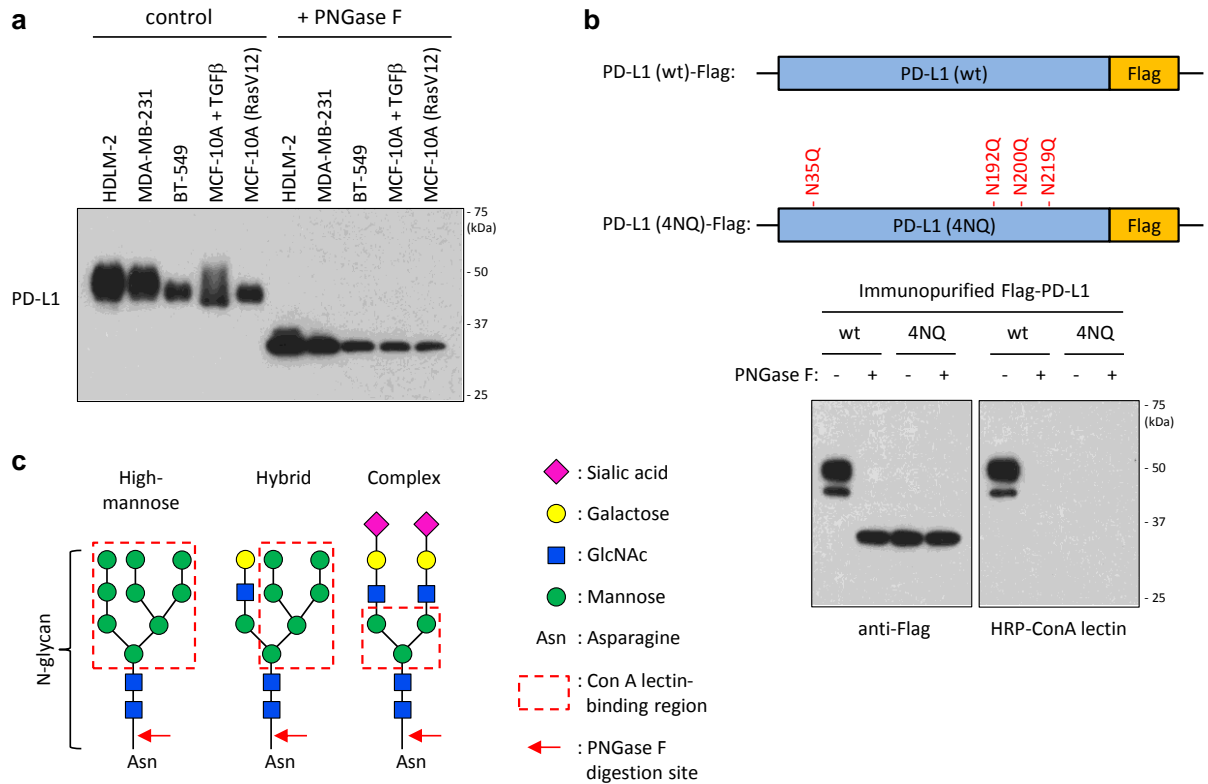

**Supplementary Figure 2. PD-L1 is modified by N-glycosylation.**

**(a)** Glycosylation pattern of PD-L1 protein in various cell lines. Cell lysates were treated with N-glycosidase F (PNGase F) to remove N-linked oligosaccharides and analyzed by western blotting.

**(b)** Top: Schematic illustrating wild-type (wt) PD-L1 and its glycosylation-site mutant (4NQ). The four glycosylation sites of PD-L1 are indicated. Bottom: Concanavalin A (ConA) lectin binding assay showing ConA lectin binding specificity to glycosylated PD-L1 (wt) and unglycosylated PD-L1 in which glycosylation was abolished by PNGase F or mutagenesis (4NQ).

**(c)** Schematic illustrating the three major types of N-glycan, including high-mannose, hybrid and complex glycans. ConA lectin-binding regions and PNGase F digestion sites are indicated.

**a**

| NG site | Tryptic Peptide Sequence                      | Theoretical m/z of NxT | Theoretical m/z of DxT | N-glycan site occupancy (%) |                   |
|---------|-----------------------------------------------|------------------------|------------------------|-----------------------------|-------------------|
|         |                                               |                        |                        | Epithelial cells            | Mesenchymal cells |
| 35      | K.DLYVVEYGS <sup>N35</sup> MTIECK.F           | 968.9369               | 969.4289               | 10.6                        | 93.3              |
| 192     | K.LFN <sup>N192</sup> VTSTLR.I                | 525.8007               | 526.2927               | 28.8                        | 99.5              |
| 200     | R.IN <sup>N200</sup> TTTNEIFYCTFR.R           | 890.4221               | 890.9141               | 38.1                        | 99.7              |
| 219     | R.RLDPEE <sup>N219</sup> HTAELVIPELPLAHPNER.T | 708.3646               | 708.6106               | n/a                         | n/a               |

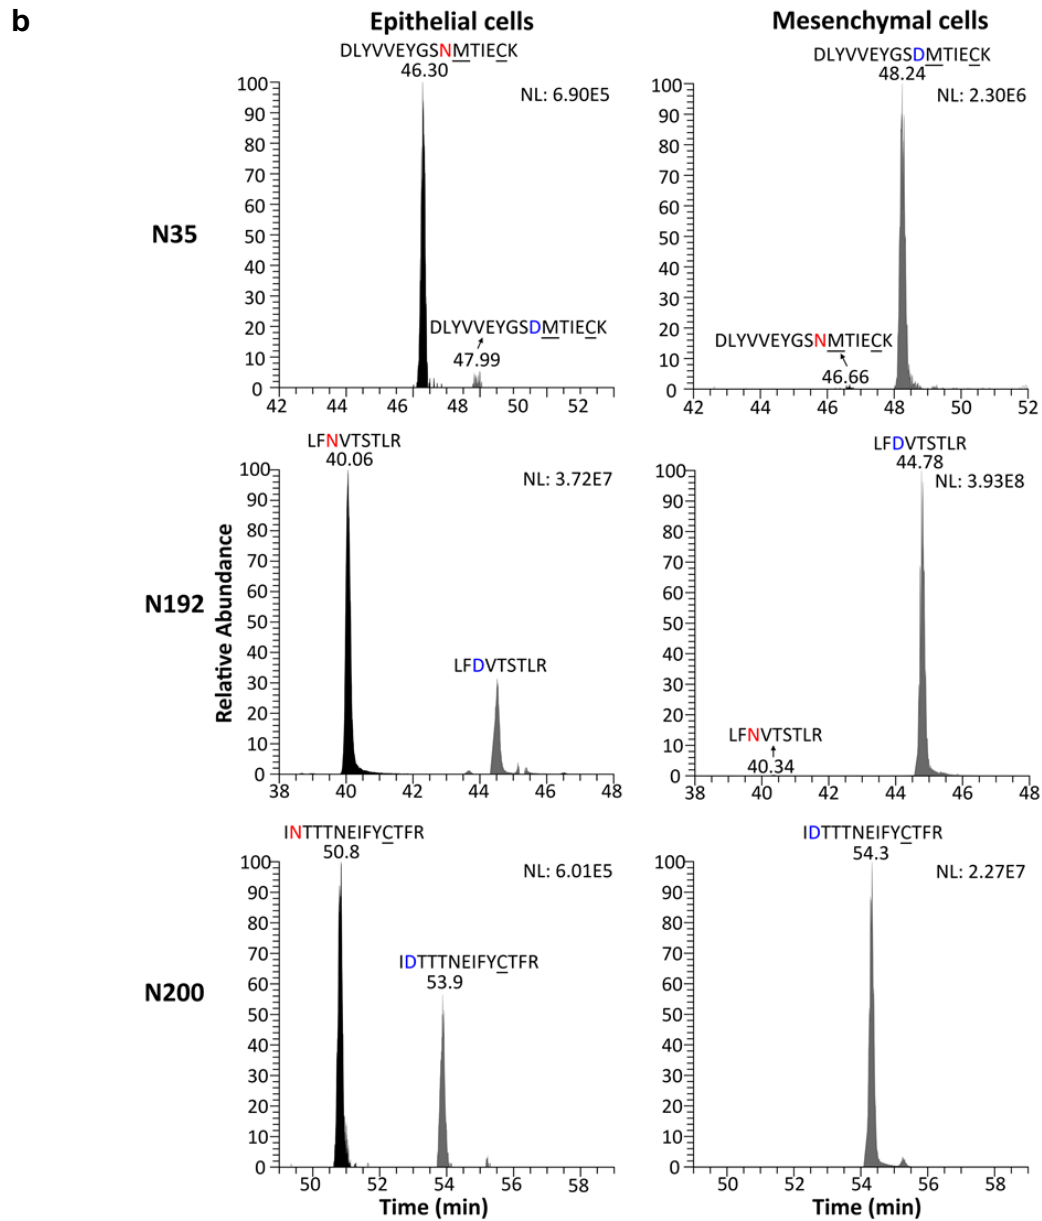

**Supplementary Figure 3. Quantification of N-glycan site occupancy of each PD-L1 N-glycosylation site upon EMT.**

**(a)** Table summarizing the N-glycan occupancy (%) of N35, N192 and N200 of PD-L1 purified from epithelial and mesenchymal cells.

**(b)** The extracted ion chromatograms for the PNGase F treated tryptic peptides corresponding to N35, N192 and N200 of PD-L1 purified from epithelial and mesenchymal cells.

**a**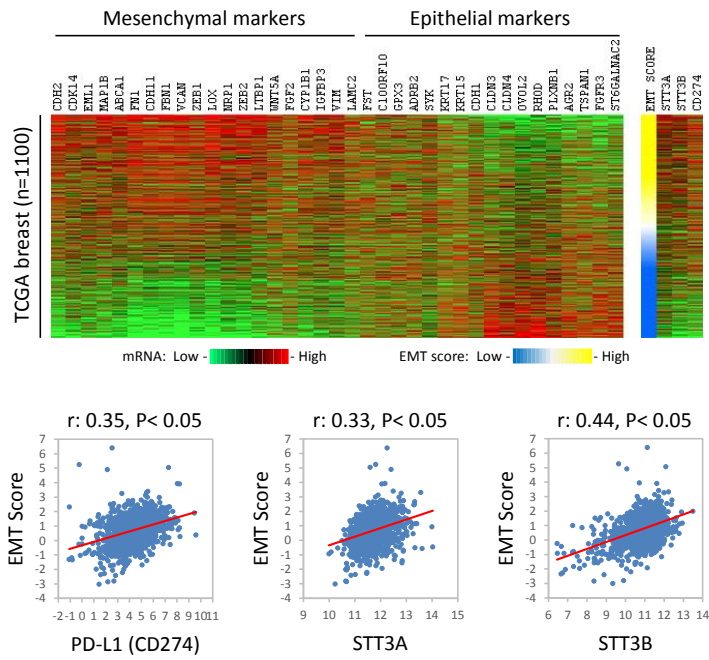**b**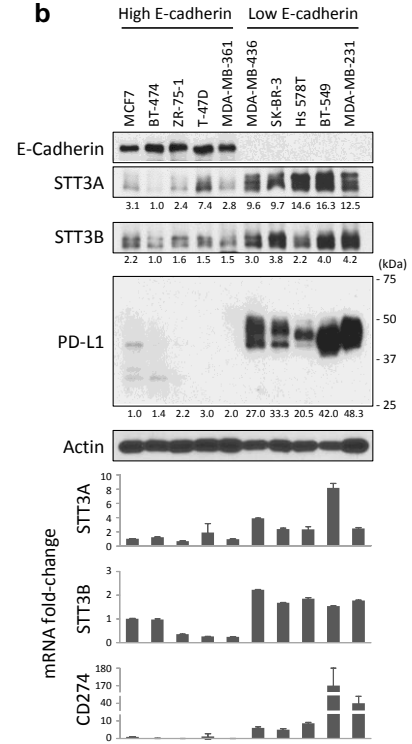**c**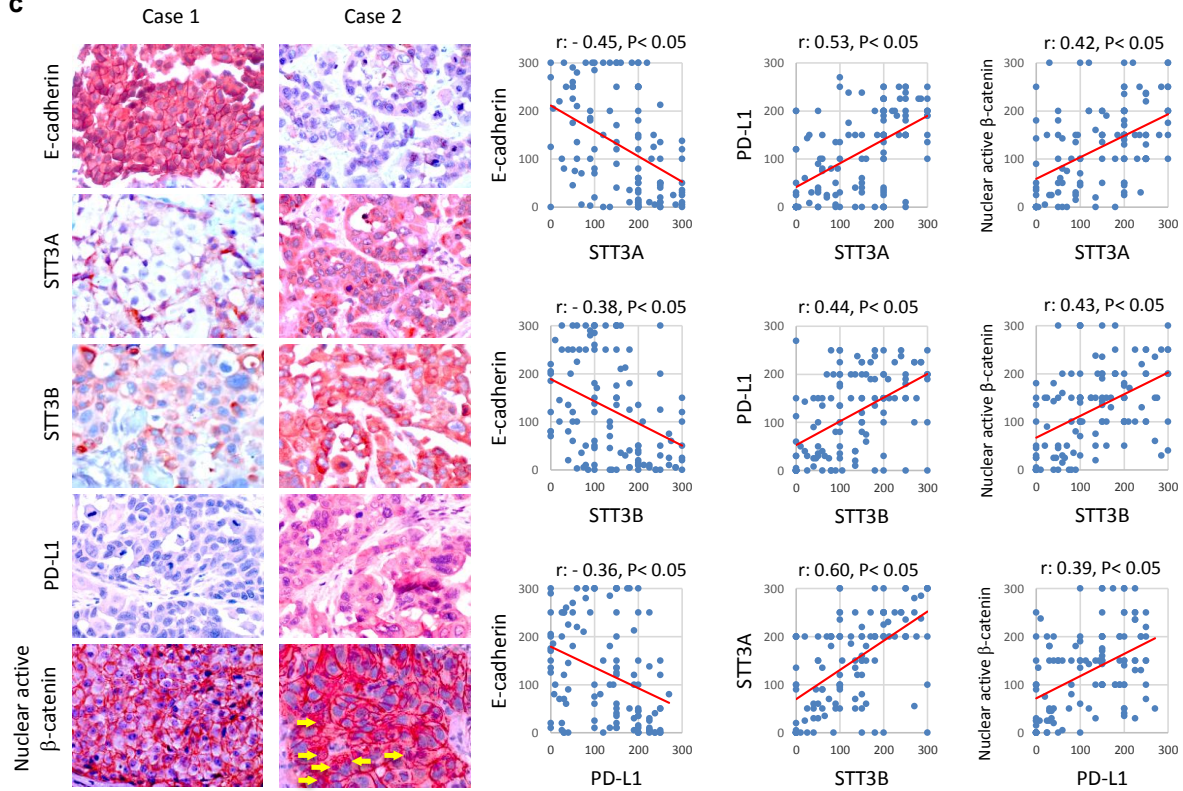

**Supplementary Figure 4. N-glycosyltransferases STT3A and STT3B are positively correlated with EMT.**

**(a)** Pearson correlation analysis of EMT score with PD-L1 (CD274), STT3A and STT3B mRNA expressions in TCGA breast cancer dataset (n = 1100).

**(b)** Western blot and qRT-PCR analysis comparing STT3A, STT3B and PD-L1 protein (top) and mRNA (bottom) expression levels between high E-cadherin-expressing and low E-cadherin-expressing breast cancer cells. The signal intensity of STT3A, STT3B and PD-L1 blots were quantified and normalized relative to the lowest signal.

**(c)** Correlation analysis between epithelial marker E-cadherin, STT3A, STT3B, PD-L1 and nuclear non-phosphorylated (active)  $\beta$ -catenin at protein levels in breast cancer tissues (n = 129). Left: Representative images from immunohistochemistry staining of E-cadherin, STT3A, STT3B, PD-L1 and nuclear non-phosphorylated (active)  $\beta$ -catenin (indicated by arrows) in primary breast cancer tissues. Right: Pearson correlation analysis of immunohistochemistry staining results.



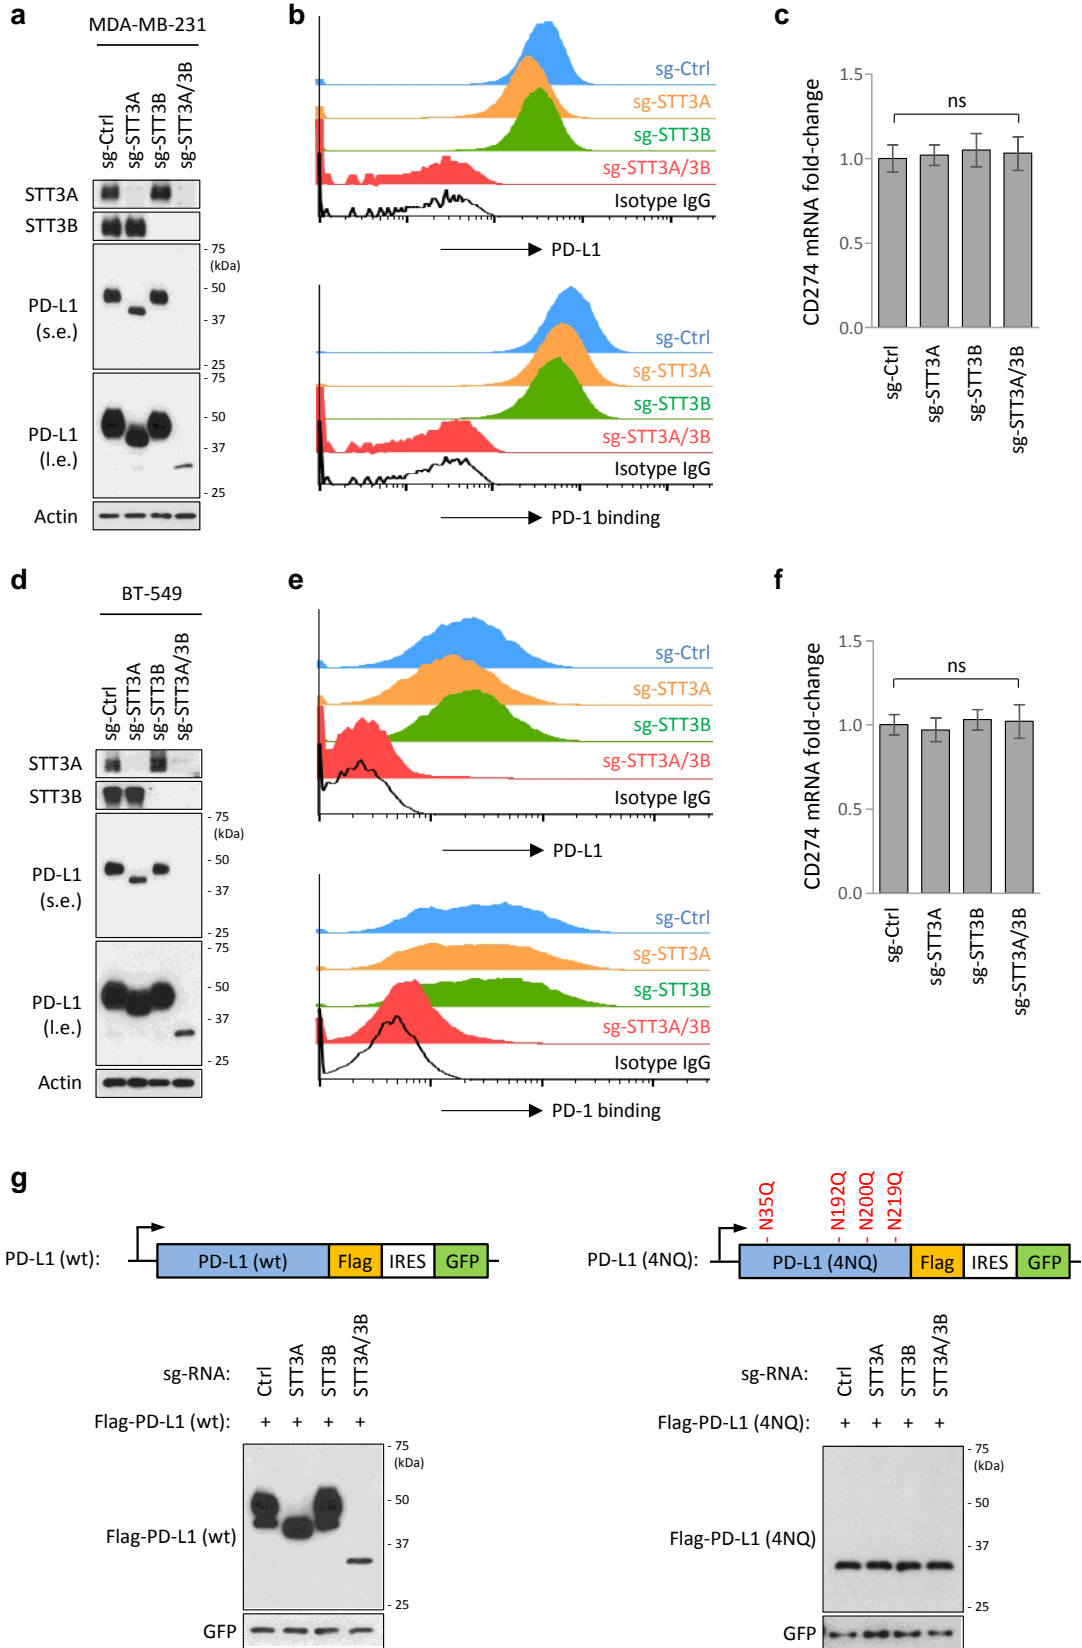

**Supplementary Figure 5. Knockdown of both STT3 isoforms suppresses PD-L1 protein expression without significant reduction of PD-L1 mRNA levels in mesenchymal-like breast cancer cells.**

**(a, d)** Effect of STT3 isoforms knockdown on the expression and molecular weight of endogenous PD-L1 protein in MDA-MB-231 **(a)** and BT-549 **(d)** cells.

**(b, e)** Flow cytometric analysis of the effect of STT3 isoforms knockdown on the cell surface PD-L1 expression and PD-1 binding ability of MDA-MB-231 **(b)** and BT-549 **(e)** cells.

**(c, f)** Influence of STT3 isoforms knockdown on PD-L1 (CD274) mRNA levels in MDA-MB-231 **(c)** and BT-549 **(f)** cells.

**(g)** Top: Schematic illustrating co-expression constructs of PD-L1 (wt or 4NQ) and green fluorescent protein (GFP) used to assay the protein expression status of PD-L1. GFP was used as an internal control for transfection efficiency and gene expression. IRES: internal ribosome entry site. Bottom: Effect of STT3 isoforms knockdown on the protein expression amounts of PD-L1 (wt) or (4NQ) protein in BT-549 cells.

Error bars represent s.d. (n = 3). \*: P < 0.05; ns: non-significant, Student's t-test.

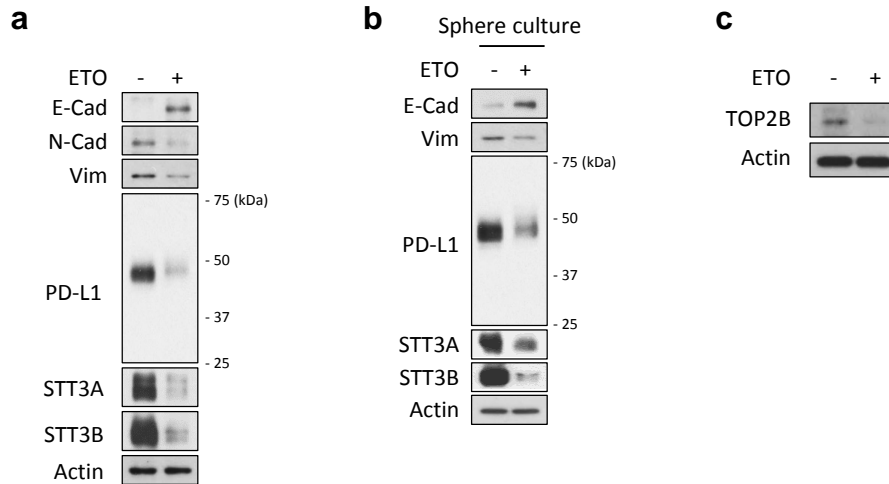

**Supplementary Figure 6. Etoposide induces MET and downregulation of STT3 and PD-L1 in MDA-MB-231 cells.**

**(a)** Effect of etoposide (5  $\mu\text{g/ml}$ , 4 days) on the expression of EMT markers, STT3 isoforms and PD-L1 in the general cell population of MDA-MB-231 cells.

**(b)** Western blot analysis of EMT markers, STT3 isoforms and PD-L1 of tumorspheres derived from etoposide-treated MDA-MB-231 cells.

**(c)** Effect of etoposide on TOP2B expression in the general cell population of MDA-MB-231 cells.

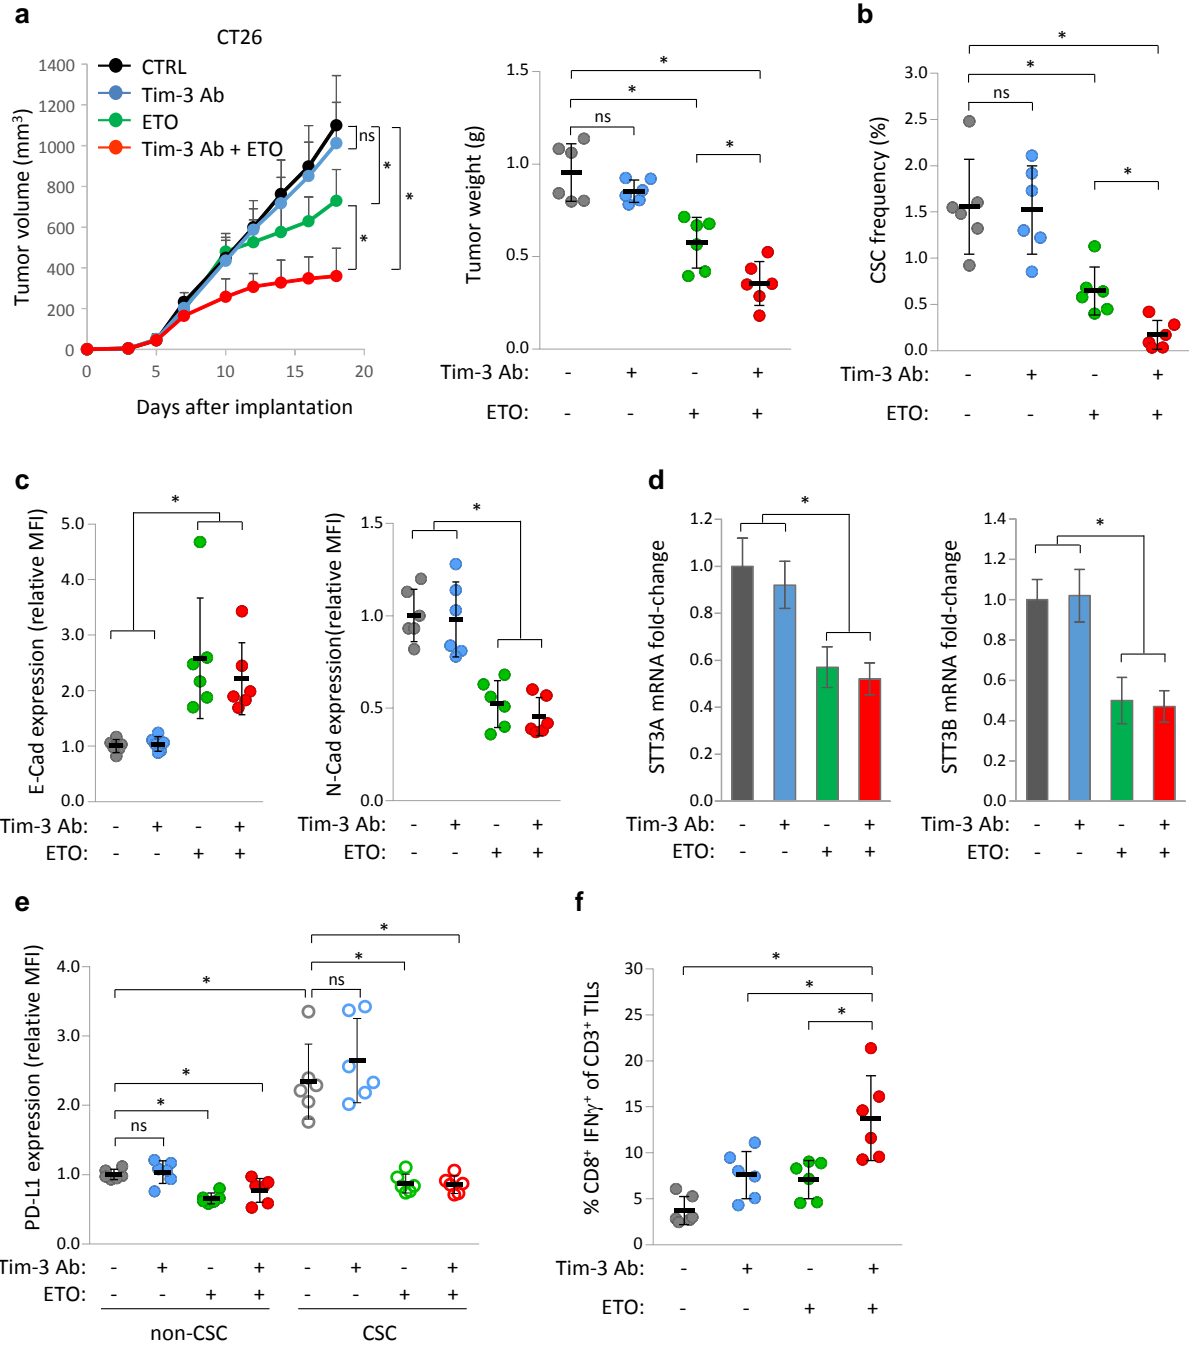

**Supplementary Figure 7. Etoposide synergizes with Tim-3 blockade therapy in CT26 colorectal tumor model.**

**(a)** Tumor growth of CT26 cells in BALB/c mice treated with Tim-3 antibody (Tim-3 Ab) and/or etoposide (ETO). Tumor size was measured at the indicated time points and tumor weight was measured at the endpoint (n = 6 mice per group).

**(b)** Efficacy of indicated treatments on the CSC (CD44<sup>+</sup>CD133<sup>+</sup>ALDH1<sup>+</sup> populations) frequency of CT26 tumors.

**(c)** Flow cytometric analysis comparing the effect of indicated treatments on the expression of E-cadherin (E-Cad, epithelial marker) and N-cadherin (N-Cad, mesenchymal marker) in the entire cancer cell population of CT26 tumors.

**(d)** qRT-PCR analysis of the influence of indicated treatments on STT3 isoforms expression in the entire cancer cell population of CT26 tumors.

**(e)** Effect of indicated treatments on PD-L1 expression in the CSC and non-CSC populations of CT26 tumors.

**(f)** Intracellular cytokine staining of CD8<sup>+</sup> IFN $\gamma$ <sup>+</sup> cells in the CD3<sup>+</sup> T cell populations from isolated tumor-infiltrating lymphocytes to analyze the impacts of indicated treatments on tumor-infiltrating cytotoxic T cell activity.

Error bars represent s.d. (n = 6). \*P < 0.05; ns: non-significant, Student's t-test.

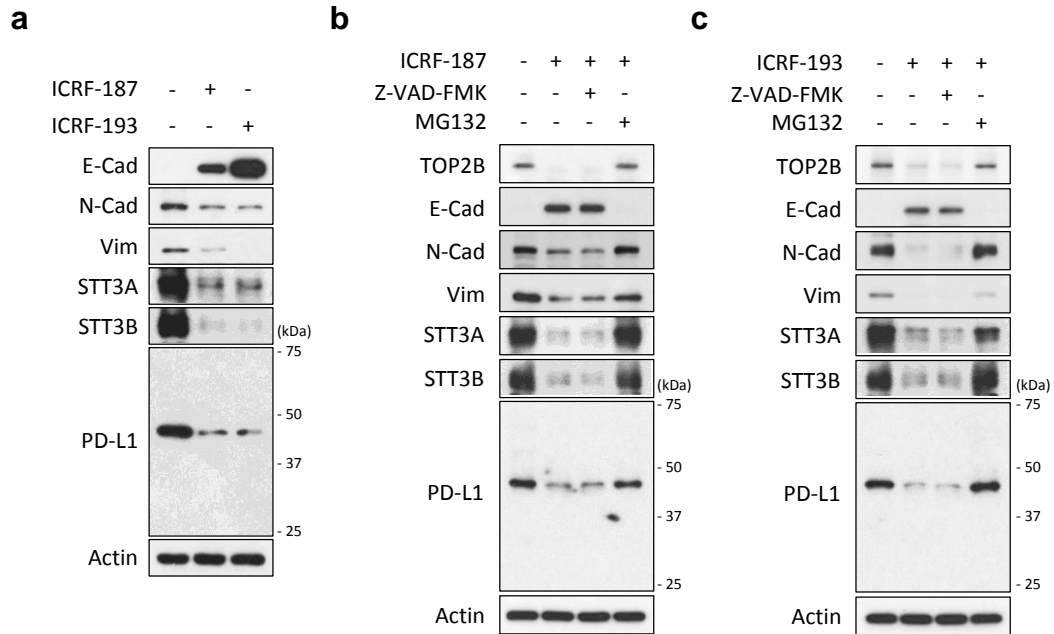

**Supplementary Figure 8. Proteasome inhibitor MG132 blocks TOP2 inhibitor-induced MET and downregulation of TOP2B, STT3 isoforms and PD-L1.**

**(a)** Effect of TOP2 inhibitors ICRF-187 and -193 (5  $\mu$ M, 24 hr) on the expression of EMT markers, STT3 isoforms and PD-L1 in 4T1 cells.

**(b, c)** Effect of proteasome inhibitor (MG132) and caspase inhibitor (Z-VAD-FMK) on TOP2 inhibitor-induced TOP2B degradation, MET and downregulation of STT3 and PD-L1.

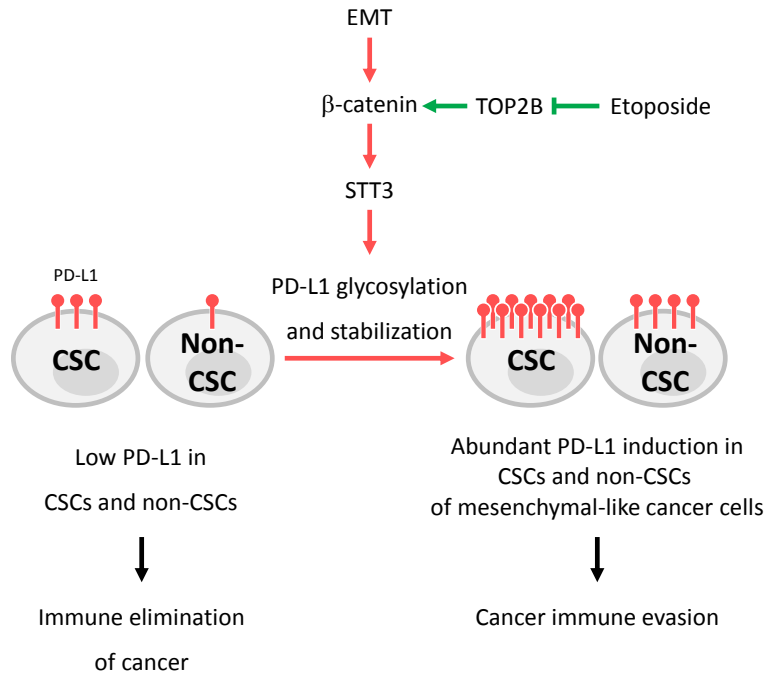

**Supplementary Figure 9. Schematic illustrating the regulation of PD-L1 in CSCs and non-CSCs by the EMT/ $\beta$ -catenin/STT3/PD-L1 axis and etoposide.** EMT induces N-glycosyltransferase STT3 through  $\beta$ -catenin. STT3 positively regulates PD-L1 glycosylation and stabilization, leading to PD-L1 induction in CSCs and non-CSCs. High PD-L1 expression contributes to cancer immune evasion. Etoposide reduces nuclear  $\beta$ -catenin through TOP2B degradation and inhibits the EMT- $\beta$ -catenin-STT3-PD-L1 signaling axis, resulting in sensitization of both CSCs and non-CSCs to immune elimination.

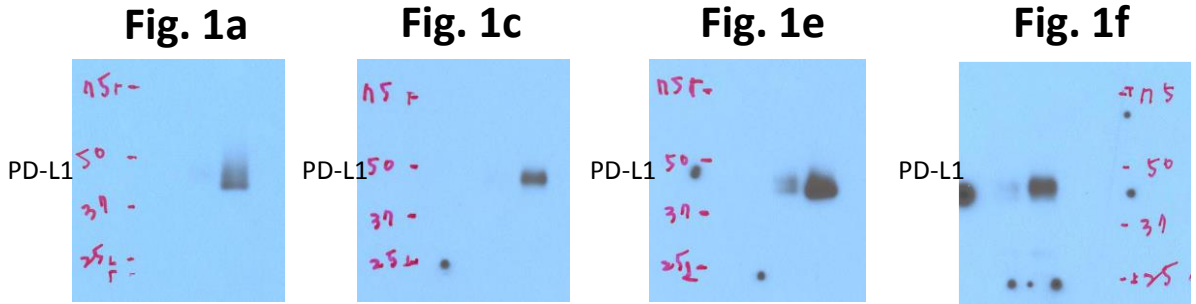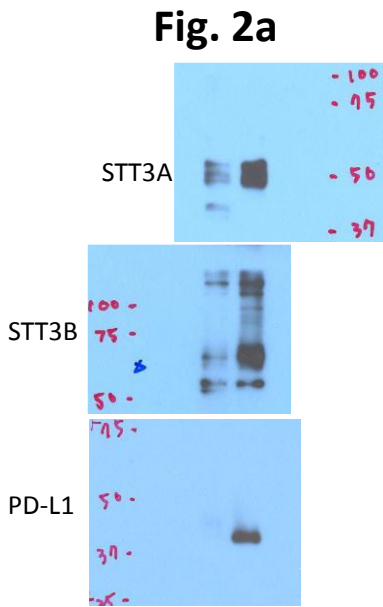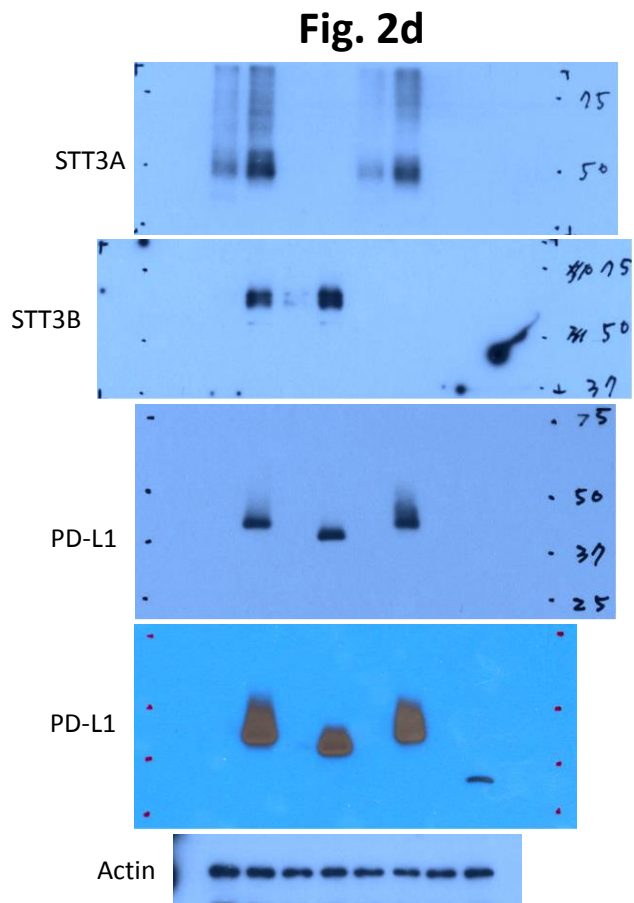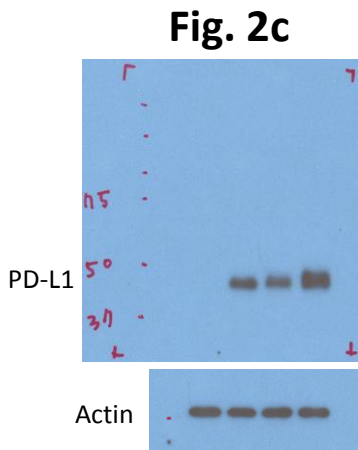



**Fig. 2h**

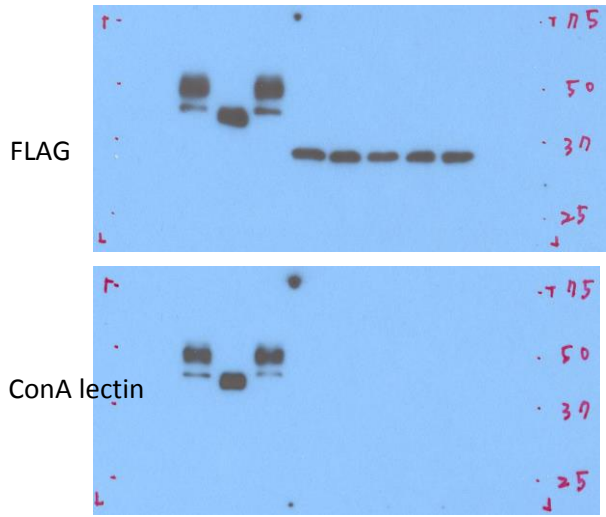

**Fig. 2i**

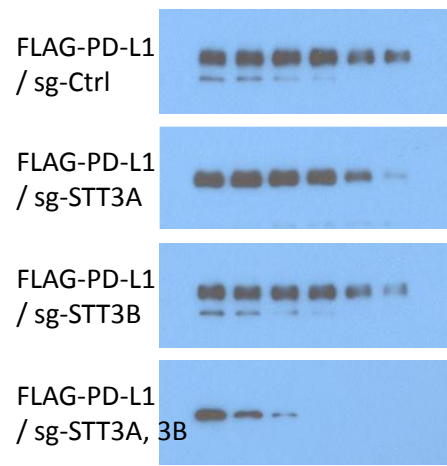

**Fig. 2j**

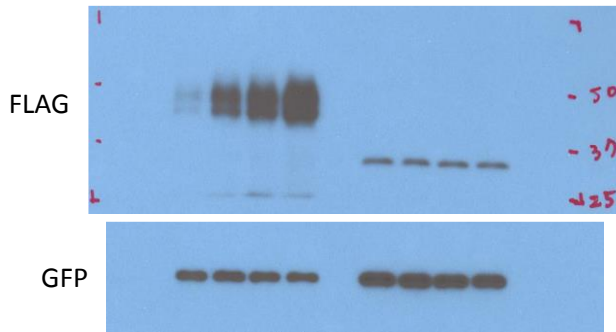

**Fig. 3a**

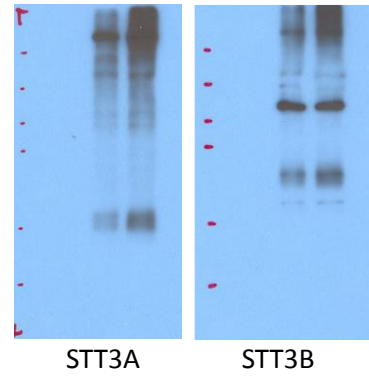

**Fig. 3b**

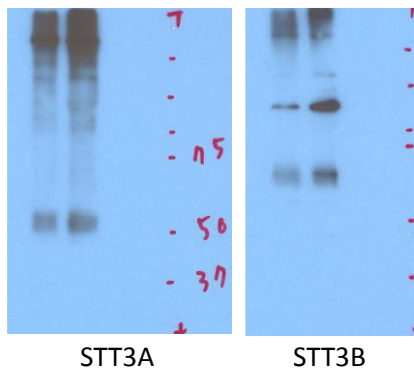

**Fig. 3c**

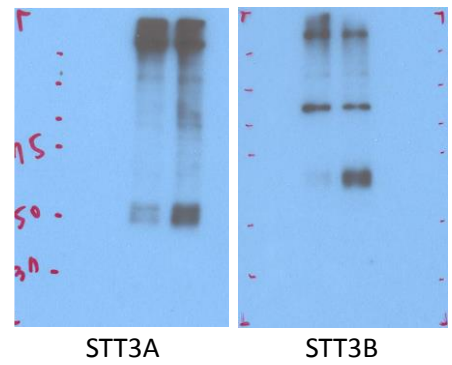

**Fig. 4d**

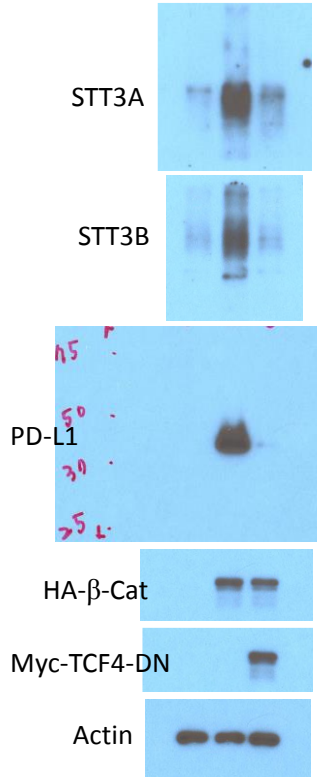

**Fig. 4e**

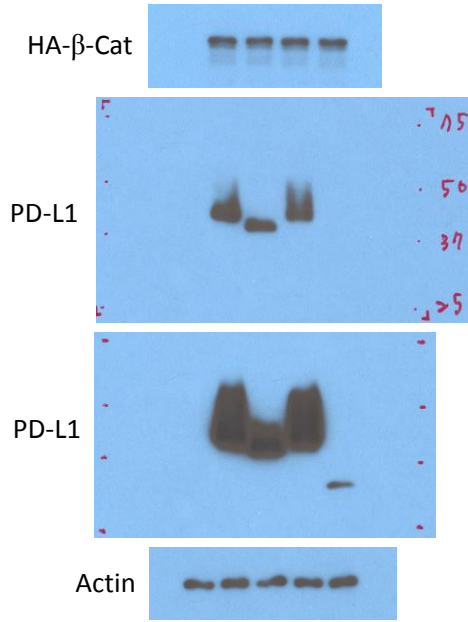

**Fig. 4f**

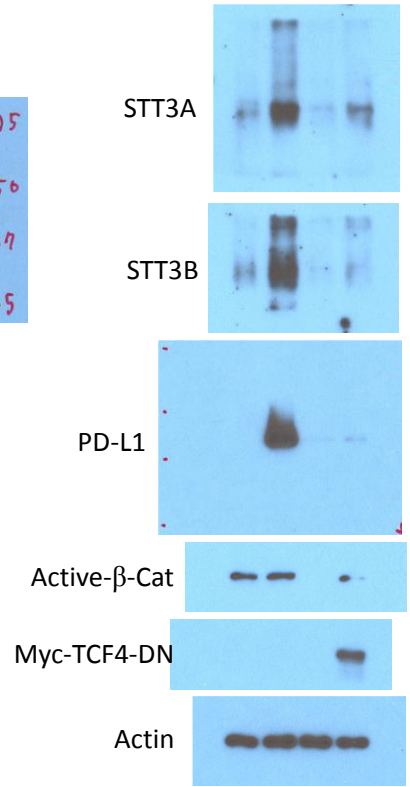

**Fig. 4g**

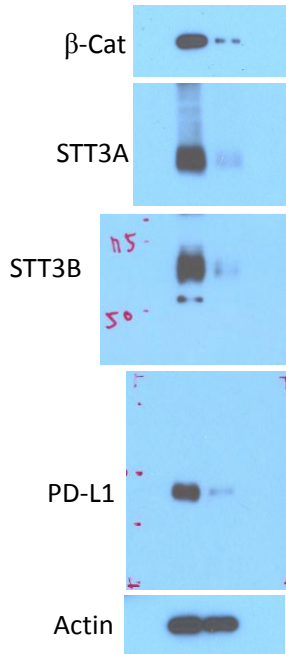

**Fig. 5a**

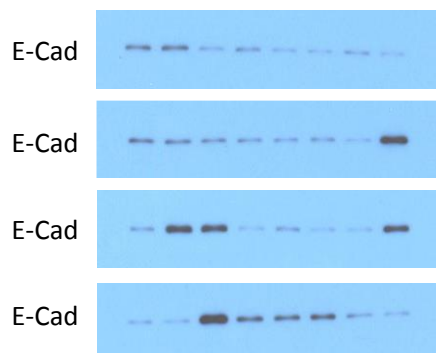

**Fig. 6a**

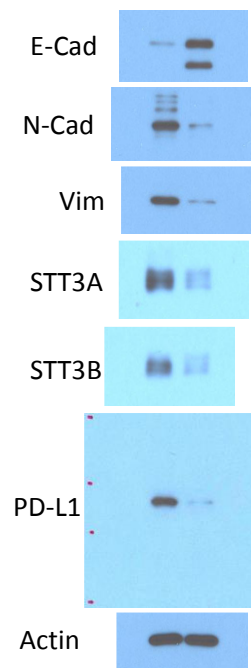

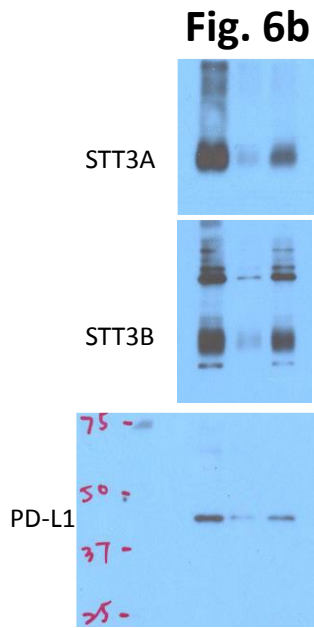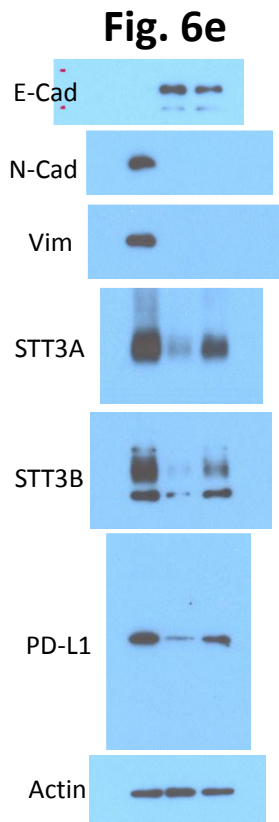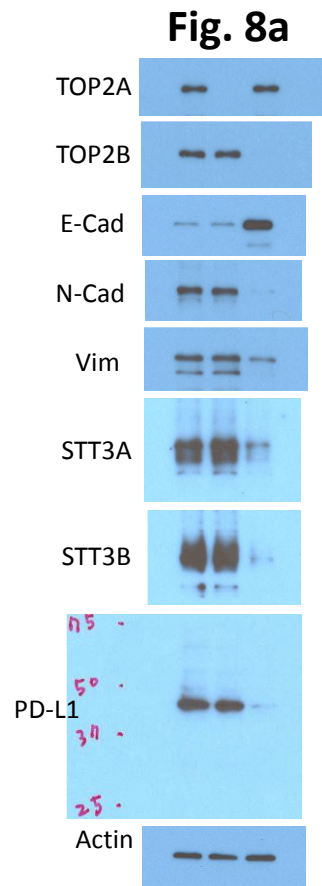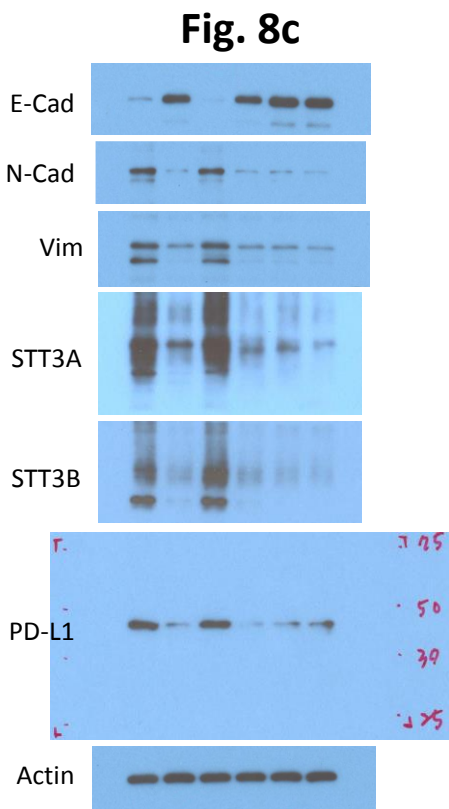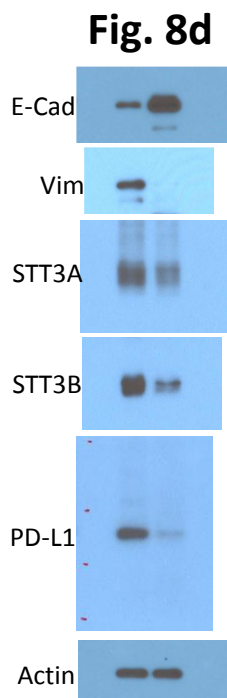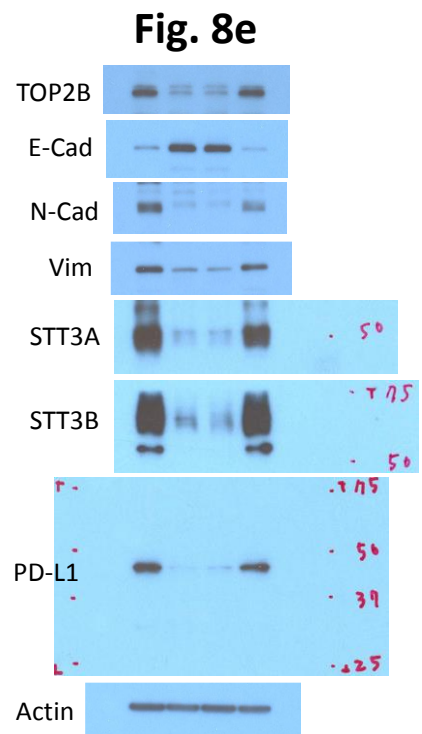

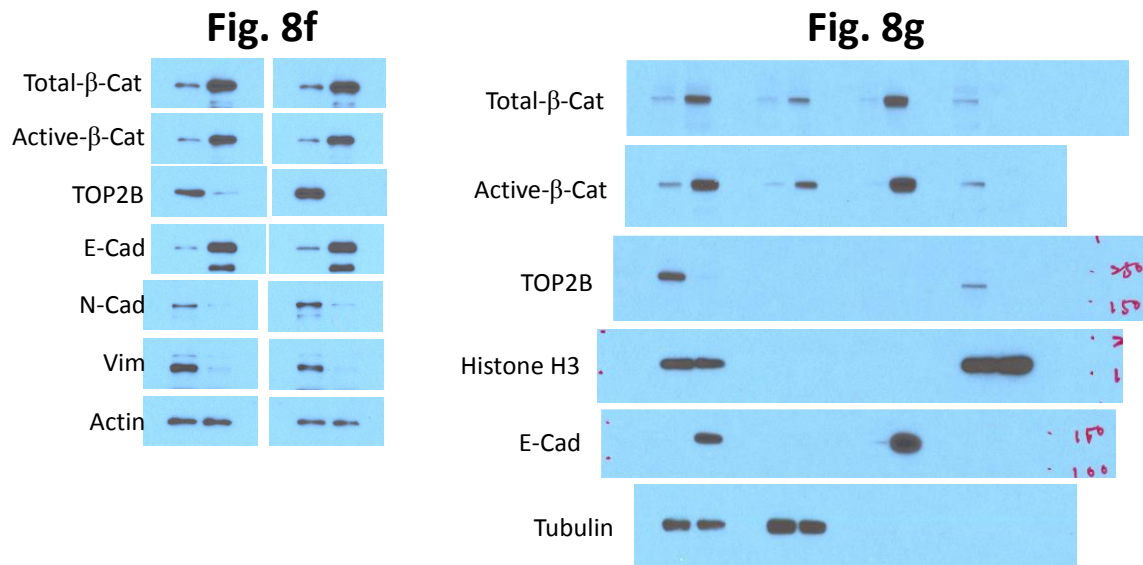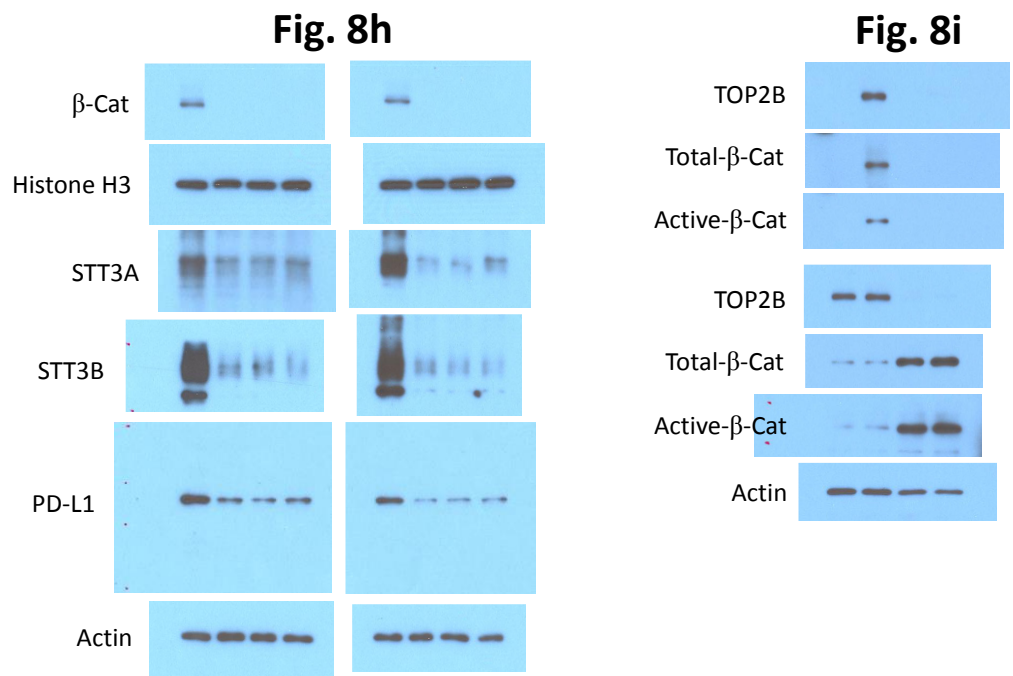

**Supplementary Figure 10.** Uncropped scans of the Western blots shown in the indicated figures.

**Supplementary Table 1, related to Figure 5.** List of the chemical compound concentrations used in Figure 5.

| Chemical compound | Concentration for 24-h treatment ( $\mu\text{M}$ ) | Concentration for 96-h treatment ( $\mu\text{M}$ ) |
|-------------------|----------------------------------------------------|----------------------------------------------------|
| Chlorambucil      | 25                                                 |                                                    |
| Cyclophosphamide  | 50                                                 |                                                    |
| Carmustine        | 15                                                 |                                                    |
| Busulfan          | 5                                                  |                                                    |
| Dacarbazine       | 15                                                 |                                                    |
| Thiotepa          | 5                                                  |                                                    |
| Cisplatin         | 5                                                  |                                                    |
| Carboplatin       | 20                                                 |                                                    |
| 5-Fluorouracil    | 1                                                  |                                                    |
| 6-Mercaptopurine  | 5                                                  |                                                    |
| Gemcitabine       | 0.01                                               |                                                    |
| Methotrexate      | 0.5                                                |                                                    |
| Pentostatin       | 2                                                  |                                                    |
| Daunorubicin      | 1                                                  | 0.02                                               |
| Doxorubicin       | 2                                                  | 0.05                                               |
| Epirubicin        | 1                                                  | 0.02                                               |
| Actinomycin-D     | 0.1                                                |                                                    |
| Mitomycin-C       | 2                                                  |                                                    |
| Topotecan         | 1                                                  |                                                    |
| Irinotecan        | 5                                                  |                                                    |
| Etoposide         | 10                                                 | 0.2                                                |
| Teniposide        | 15                                                 |                                                    |
| Mitoxantrone      | 2                                                  | 0.05                                               |
| Paclitaxel        | 1                                                  | 0.02                                               |
| Docetaxel         | 2                                                  |                                                    |
| Vincristine       | 1                                                  |                                                    |

**Supplementary Table 2.** Oligonucleotide sequences used throughout this study.

| <b>Gene knockdown</b>                           |                                                                                                                                                                                                                                                                                                                                                                                                                                                                                                                                         |
|-------------------------------------------------|-----------------------------------------------------------------------------------------------------------------------------------------------------------------------------------------------------------------------------------------------------------------------------------------------------------------------------------------------------------------------------------------------------------------------------------------------------------------------------------------------------------------------------------------|
| sgRNA or siRNA (vendor, catalogue number)       | Target sequence (listed 5' to 3')                                                                                                                                                                                                                                                                                                                                                                                                                                                                                                       |
| Human STT3A sgRNA (Santa Cruz, sc-405155)       | ACAGACATTCCGAATGTCGA<br>AAGGTGGTACGTGACGATGG<br>CTCGGTCATCAAACCAGTTA                                                                                                                                                                                                                                                                                                                                                                                                                                                                    |
| Human STT3B sgRNA (Santa Cruz, sc-404481)       | GATGTAAGGCCGCTAAAAGT<br>CCAGCGGTTATCATCAACCC<br>TACAGCAAAAAGAGTCTACAT                                                                                                                                                                                                                                                                                                                                                                                                                                                                   |
| Human $\beta$ -catenin siRNA (Sigma, EHU139421) | GCCGGCTATTGTAGAAGCTGGTGGAA<br>ATGCAAGCTTTTAGGACTTCACCTGA<br>CAGATCCAAGTCAACGTCTTGTTCA<br>GAACTGTCTTTGGACTCTCAGGAAT<br>CTTTCAGATGCTGCAACTAAACAGG<br>AAGGGATGGAAGGTCTCCTTGGGAC<br>TCTTGTTTCAGCTTCTGGGTTTCAGAT<br>GATATAAATGTGGTCACCTGTGCAG<br>CTGGAATTCTTTCTAACCTCACTTG<br>CAATAATTATAAGAACAAGATGATG<br>GTCTGCCAAGTGGGTGGTATAGAGG<br>CTCTTGTCGCTACTGTCTTCGGGC<br>TGGTGACAGGGAAGACATCACTGAG<br>CCTGCCATCTGTGCTCTTCGTCATC<br>TGACCAGCCGACACCAAGAAGCAGA<br>GATGGCCCAGAATGCAGTTCGCCTT<br>CACTATGGACTACCAGTTGTGGTTA<br>AGCTCTTACACCCACCATCCCCT |
| Mouse $\beta$ -catenin siRNA (Sigma, EMU047621) | AGGGTGGGAATGGTTTTAGGCCTGT<br>TTGTAATCTGCCACCAAACAGATA<br>CATACTTGGAAAGGAGATGTTTCATG<br>TGTGGAAGTTTCTCACGTTGATGTT<br>TTTGCCACAGCTTTTGCAGCGTTAT<br>ACTCAGATGAGTAACATTTGCTGTT<br>TTCAACATTAATAGCAGCCTTTCTC<br>TCTATACAGCTGTAGTGTCTGAACG<br>TGCATTGTGATTGGCCTGTAGAGTT<br>GCTGAGAGGGCTCGAGGGGTGGGCT<br>GGTATCTCAGAAAGTGCTGACACA<br>CTAACCAAGCTGAGTTTCTATGGG<br>AACAGTCGAAGTACGCTTTTTGTTC<br>TGGTCCTTTTTGGTCGAGGAGTAAC<br>AATACAAATGGATTTGGGGAGTGAC<br>TCACGCAGTGAAGAATGCACACGAA<br>TGGATCACAAAG                                              |

|                                           |                                                                      |
|-------------------------------------------|----------------------------------------------------------------------|
| Mouse TOP2A sgRNA (Santa Cruz, sc-423469) | CTCATCGTCGTCATAGTTAC<br>CTCCGCCAGATACCTACAT<br>TGGGTTTACGATGAAGATGT  |
| Mouse TOP2B sgRNA (Santa Cruz, sc-423470) | CTTCGTCTGATAACATACAT<br>ACTGATCCAATGTATGTATC<br>TCTACTTTGTGTTCTACTAC |

#### qRT-PCR

| Target gene | Primer sequence (listed 5' to 3')                  |
|-------------|----------------------------------------------------|
| Human CD274 | TGCCGACTACAAGCGAATTACTG<br>CTGCTTGTCCAGATGACTTCGG  |
| Mouse CD274 | TGCGGACTACAAGCGAATCACG<br>CTCAGCTTCTGGATAACCCTCG   |
| Human STT3A | GAAGCAACAGGATTCCACCTACC<br>CAATGGACGGAGAAGAGTAGGC  |
| Mouse STT3A | GCAACCTGTCTGATGCTCGGAT<br>ATGTGGACAGCACCTGGGAAAC   |
| Human STT3B | GCAGGTGCTGTGTTCCCTTAGTG<br>GTCGTAGGTTGATGCTCAGACAC |
| Mouse STT3B | CCTACTCCAGTCCAAGTGTGGT<br>GCCAGCAATCTGATAGCCGTAG   |
| Mouse CDH1  | GGTCATCAGTGTGCTCACCTCT<br>GCTGTTGTGCTCAAGCCTTCAC   |
| Mouse VIM   | CGGAAAGTGGAATCCTTGCAGG<br>AGCAGTGAGGTCAGGCTTGAA    |
