# Supplementary material for: STT3-dependent PD-L1 accumulation on cancer stem cells promotes immune evasion
Source: PubMed Central journal article supplement (PMC5954021; doi:10.1038/s41467-018-04313-6), 2018-05-15
Supplement: 41467_2018_4313_MOESM3_ESM.pdf [file 41467_2018_4313_MOESM3_ESM.pdf]

## **Description of Additional Supplementary Files**

### **File Name: Supplementary Data 1**

**Description:** EMT scores calculated based on mRNA expression signatures of 37 core EMT-related genes, including 20 mesenchymal genes and 17 epithelial genes.
